# Supplementary material for: Siglec Receptors Modulate Dendritic Cell Activation and Antigen Presentation to T Cells in Cancer
Source: PubMed Central journal article supplement (PMC8927547; doi:10.3389/fcell.2022.828916), 2022-03-03
Supplement: DataSheet1.pdf [file DataSheet1.pdf]

## **Supplementary data**

### **Siglec receptors modulate dendritic cell activation and antigen presentation to T cells**

Jinyu Wang, Michela Manni, Anne Bärenwaldt, Ronja Wieboldt, Nicole Kirchhammer, Michal Stanczak, Alfred Zippelius, David König, Natalia Rodrigues Manutano, and Heinz Läubli

**Material**

| <b>REAGENTS or RESOURCE</b>            | <b>SOURCE</b> | <b>IDENTIFIER</b> |
|----------------------------------------|---------------|-------------------|
| <b>Antibodies</b>                      |               |                   |
| APC-eFluor780 anti-human CD3 (SK7)     | eBioscience   | Cat# 47-0036-42   |
| APC-eFluor780 anti-human CD19 (SJ25C1) | eBioscience   | Cat# 47-0198-42   |
| APC-eFluor780 anti-human CD56 (CMSSB)  | eBioscience   | Cat# 47-0567-42   |
| BV711 anti-human CD45 (H130)           | Biolegend     | Cat# 304050       |
| PE-cy7 anti-human CD11c (3.9)          | Biolegend     | Cat# 301608       |
| FITC anti-human HLA-DR (L243)          | Biolegend     | Cat# 307604       |
| PE-CF594 anti-human CD123 (7G3)        | BD            | Cat# 562391       |
| BV421 anti-human CD1c (L161)           | Biolegend     | Cat# 331526       |
| Percp-cy5.5 anti-human CD141 (M80)     | Biolegend     | Cat# 344112       |
| PE anti-human Siglec-7 (6-434)         | Biolegend     | Cat# 339204       |
| APC anti-human Siglec-8 (7C9)          | Biolegend     | Cat# 347106       |
| APC anti-human Siglec-9 (191240)       | R&D Systems   | Cat# FAB1139A-100 |
| PE anti-human Siglec-10 (5G6)          | Biolegend     | Cat# 347604       |
| BV421 anti-mouse F4/80 (BM8)           | Biolegend     | Cat# 123132       |
| BV421 anti-mouse GR-1 (RB6-8C5)        | Biolegend     | Cat# 108433       |
| Percp-cy5.5 anti-mouse CD45 (30-F11)   | eBioscience   | Cat# 45-0451-82   |

|                                        |                |                 |
|----------------------------------------|----------------|-----------------|
| BV711 anti-mouse CD11c (N418)          | Biolegend      | Cat# 117349     |
| BV605 anti-mouse MHC-II (M5/114.15.2)  | Biolegend      | Cat# 107639     |
| PE-cy7 anti-mouse MHC-II (M5/114.15.2) | eBioscience    | Cat# 25-5321-80 |
| APC anti-mouse MHC-II (M5/114.15.2)    | Biolegend      | Cat# 107614     |
| BV510 anti-mouse CD11b (M1/70)         | Biolegend      | Cat# 101263     |
| AF488 anti-mouse CD8a (53-6.7)         | BD Biosciences | Cat# 557668     |
| APC anti-mouse CD8 (53-6.7)            | eBioscience    | Cat# 17-0081-83 |
| AF488 anti-mouse CD103 (2E7)           | Biolegend      | Cat# 121420     |
| PE-cy7 anti-mouse Siglec-E (M1304A01)  | Biolegend      | Cat# 677108     |
| PE anti-mouse Siglec-F (E50-2440)      | BD Biosciences | Cat# 552126     |
| APC anti-mouse Siglec-G (SH2.1)        | eBioscience    | Cat# 17-5833-82 |
| PE anti-mouse MHC-I (AF6-88.5)         | Biolegend      | Cat# 116508     |
| APC anti-mouse CD40 (3/23)             | BD Biosciences | Cat# 558695     |
| BV605 anti-mouse CD80 (16-10A1)        | Biolegend      | Cat# 104729     |
| PE anti-mouse CD80 (16-10A1)           | Biolegend      | Cat# 104708     |
| PE anti-mouse CD83 (Michel-19)         | Biolegend      | Cat# 121507     |
| APC anti-mouse CD86 (GL-1)             | Biolegend      | Cat# 105012     |
| PE anti-mouse CD86 (GL-1)              | Biolegend      | Cat# 105008     |
| PE-cy7 anti-mouse CD3 (145-2C11)       | BD Biosciences | Cat# 552774     |

BV605 anti-mouse CD3 (145-2C11)

Biolegend

Cat# 100351

APC anti-mouse CD4 (GK1.5)

eBioscience

Cat# 17-0041-83

BV711 anti-mouse CD4 (GK1.5)

BD Horizon

Cat# 563050

FITC anti-mouse CD25 (PC61)

Biolegend

Cat# 102006

*Continued*

| REAGENTS or RESOURCE                    | SOURCE                | IDENTIFIER      |
|-----------------------------------------|-----------------------|-----------------|
| <b>Antibodies</b>                       |                       |                 |
| Percp-cy5.5 anti-mouse CD44 (IM7)       | Biolegend             | Cat# 103032     |
| PE anti-mouse CD69 (H1.2F3)             | Biolegend             | Cat# 104522     |
| Percp-cy5.5 anti-mouse CD69 (H1.2F3)    | eBioscience           | Cat# 12-0691-83 |
| <b>Chemicals Dyes</b>                   |                       |                 |
| CellTrace CFSE Cell Proliferation Kit   | Invitrogen            | Cat# C34554     |
| CellTrace Violet Cell Proliferation Kit | Invitrogen            | Cat# C34557     |
| Zombie UV Fixable Viability Kit         | Biolegend             | Cat# 423108     |
| Zombie NIR Fixable Viability Kit        | Biolegend             | Cat# 423106     |
| Fixable Viability Dye eFluor 450        | eBioscience           | Cat# 65-0863-14 |
| <b>Proteins</b>                         |                       |                 |
| Recombinant murine M-CSF                | Peptotech             | Cat# 315-02     |
| Recombinant murine GM-CSF               | Peptotech             | Cat# 315-03     |
| EndoFit Ovalbumin                       | Invivogen             | Cat# Vac-pova   |
| <b>Critical commercial assays</b>       |                       |                 |
| EasySep Mouse CD4+ T Cell Isolation Kit | Stemcell Technologies | Cat# 19852      |
| EasySep Mouse CD8+ T Cell Isolation Kit | Stemcell Technologies | Cat# 19853      |

EasySep Mouse CD11c Positive Selection  
Kit II

Stemcell  
Technologies

Cat# 18780

Mouse Cytokine Array / Chemokine Array  
44-plex (MD44)

Eve Technologies

RNeasy Plus Micro Kit

Qiagen

Cat# 74034

## Supplementary Figures

A

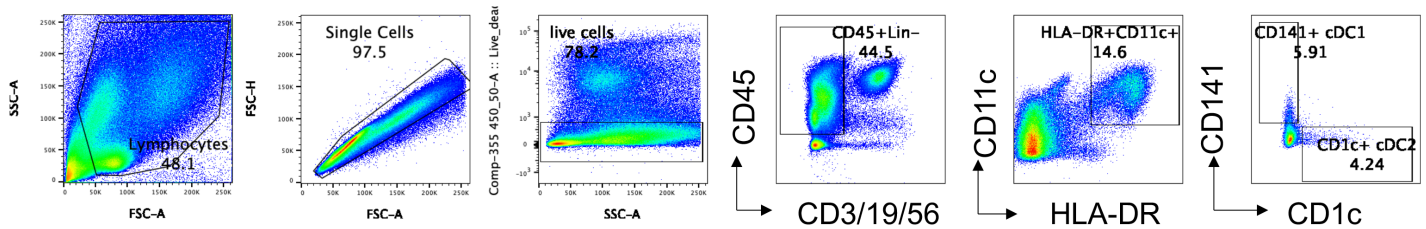

B

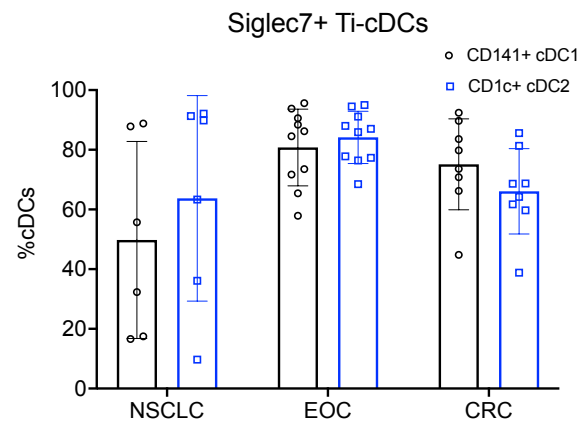

C

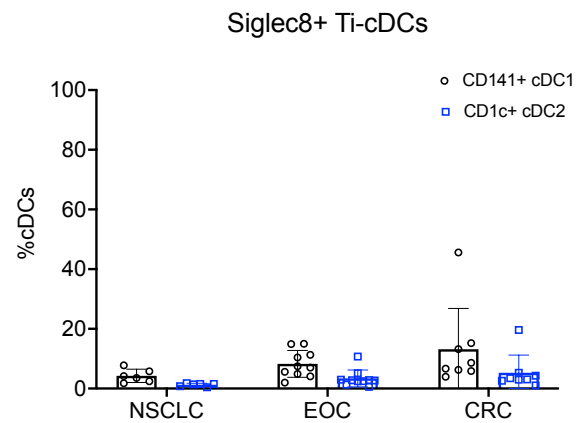

D

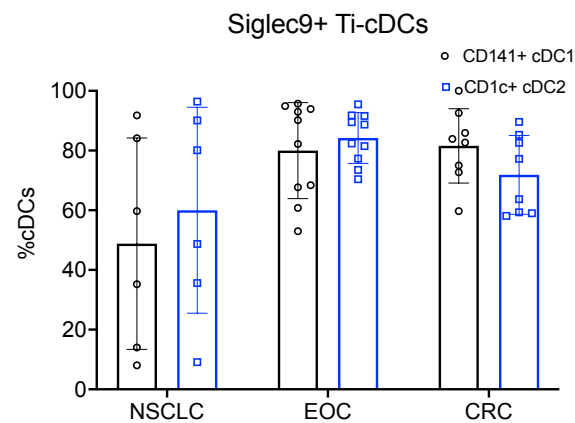

E

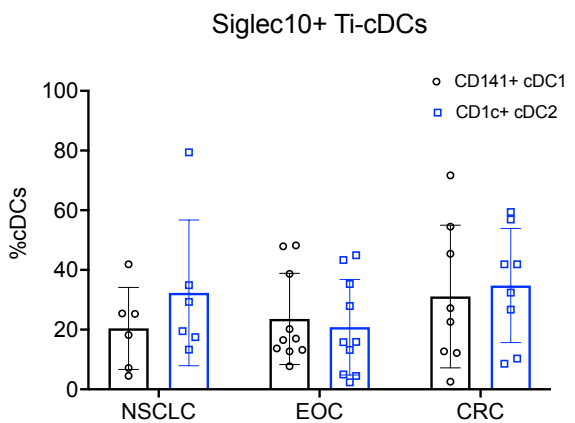

**Figure S1 Human intratumoral conventional dendritic cell subsets gating and expression of inhibitory Siglecs.** A, Gating strategy. B-E, Expression patterns of inhibitory Siglecs on tumor-infiltrating cDCs (Ti-cDCs) from NSCLC, EOC and CRC patient samples. (B) Siglec-7, (C) Siglec-8, (D) Siglec-9 and (E) Siglec-10.

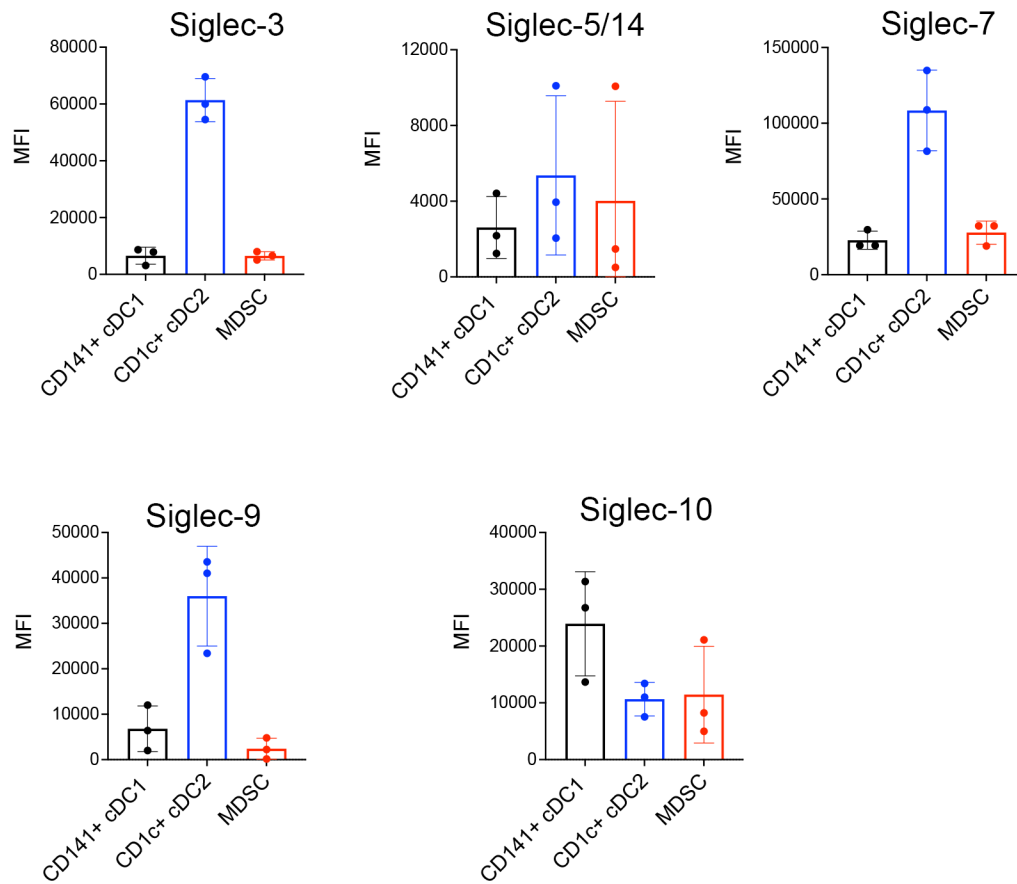

**Figure S2 Expression of inhibitory Siglecs on intratumoral DCs and other myeloid cells.**

Intratumoral cells were stained and gated as shown in Figure S1. Different dendritic cells were analyzed for their expression of the main inhibitory receptors.



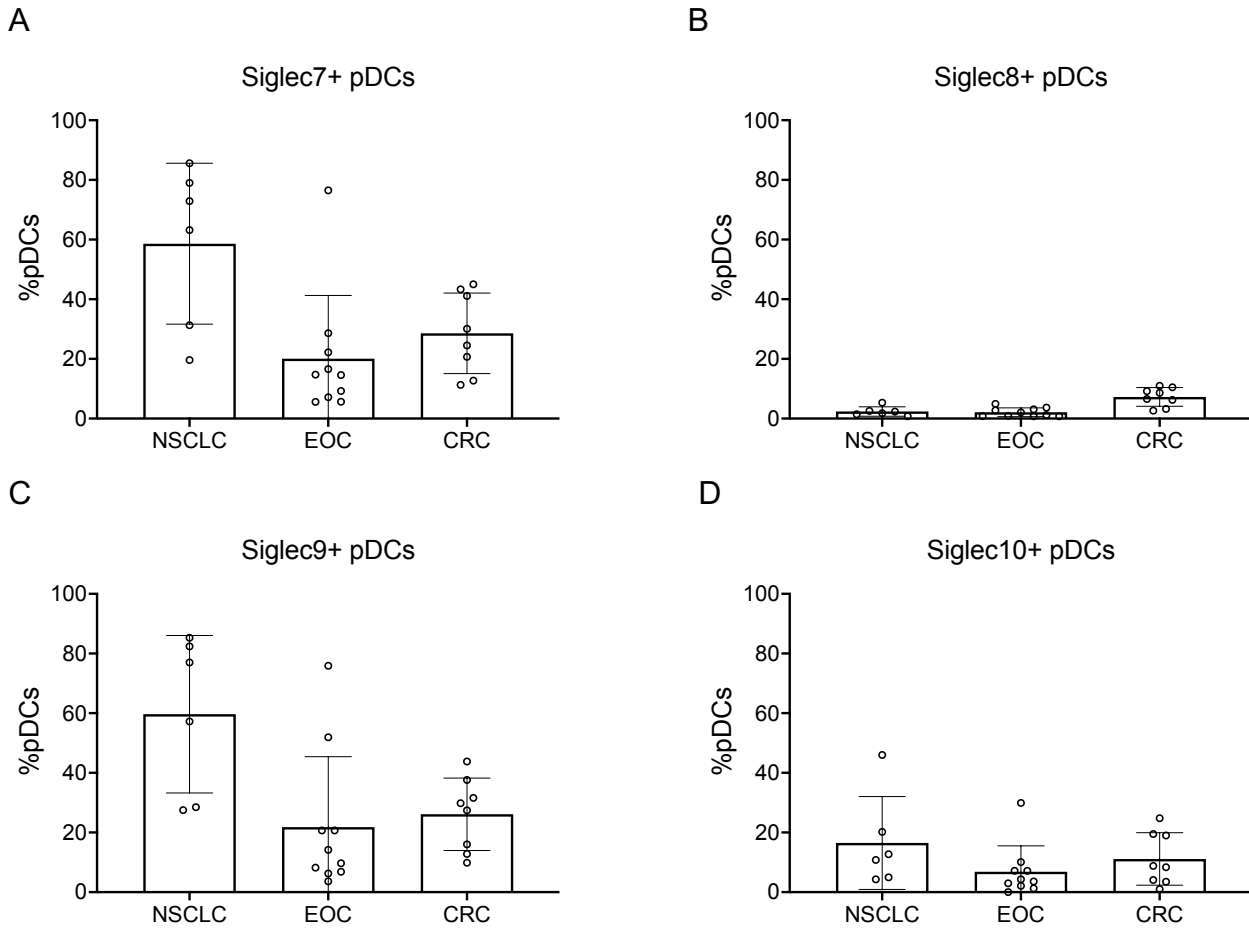

**Fig S3 Expression of inhibitory Siglecs on human tumor-infiltrating pDCs.** A-D, Flow cytometry analysis of the expression of inhibitory Siglecs on plasmacytoid dendritic cells (pDC) from primary tumor samples of non-small cell lung cancer (NSCLC), epithelial ovarian cancer (EOC) and colorectal cancer (CRC) patients. Data are presented as mean ( $\pm$  SD).

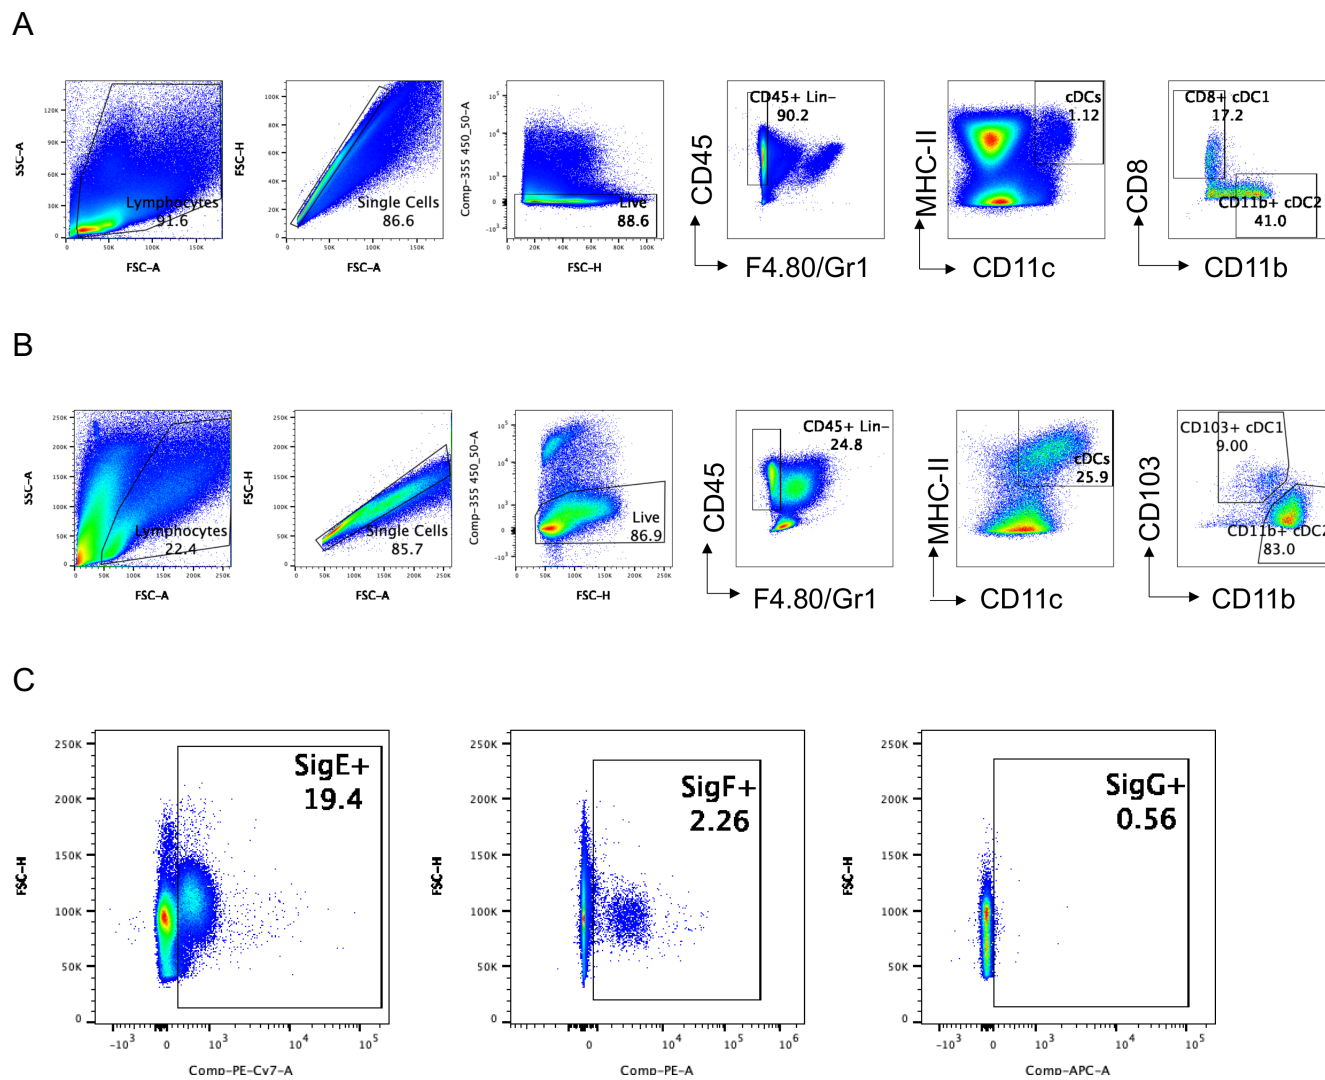

**Figure S4 Gating strategy of mouse cDCs and Siglecs. A, and B, Mouse cDC subsets gating strategies of samples from (A) spleens and (B) tumors. (C) Gating for each inhibitory murine Siglec.**

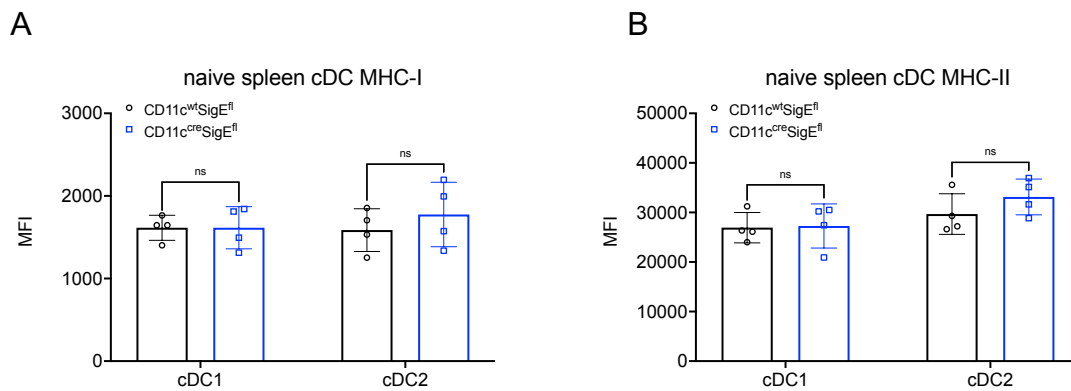

**Figure S5 Maturation markers of naïve spleen cDCs from ELox mice and littermates. A, and B,** Expression levels of (A) MHC-I and (B) MHC-II molecules on naïve spleen cDCs.

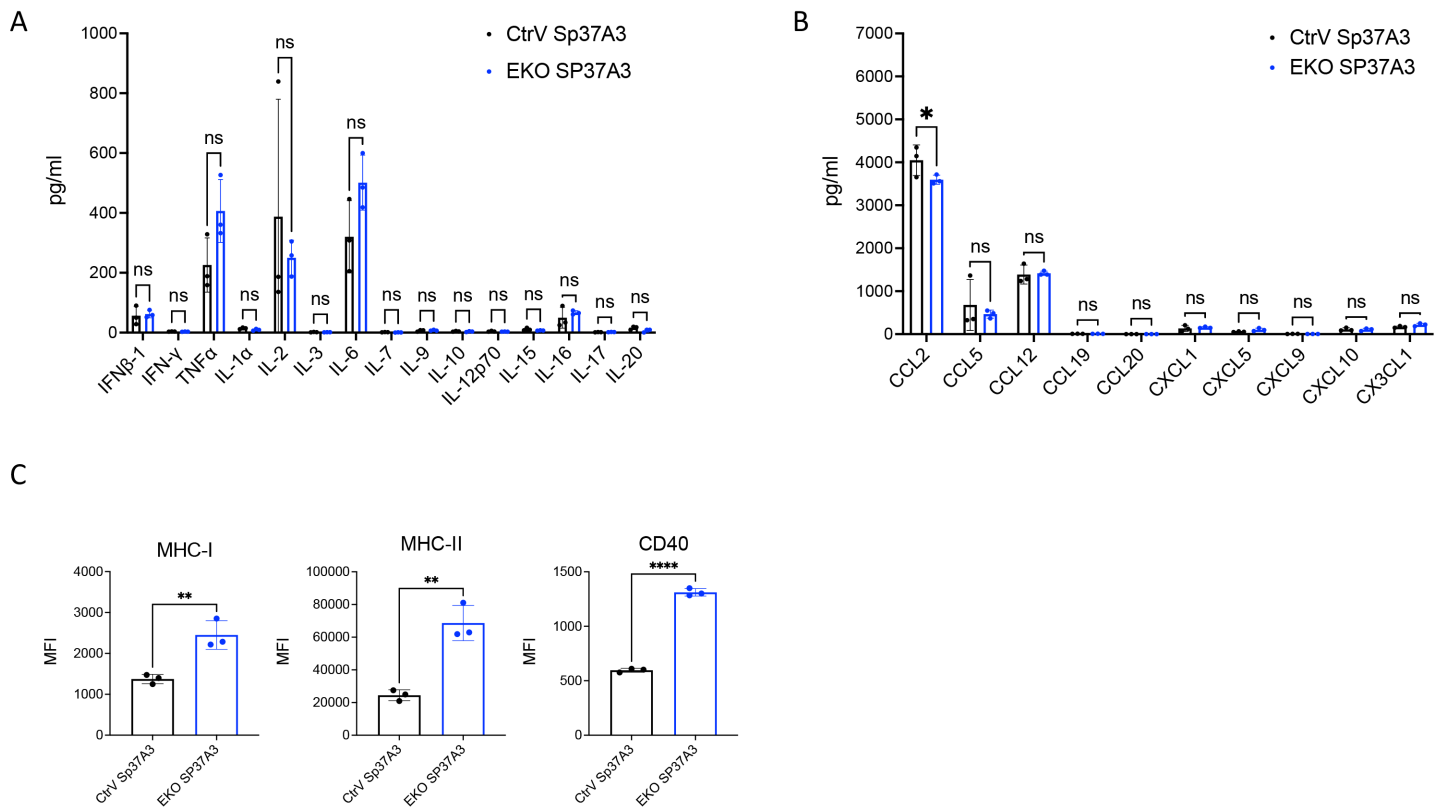

**Figure S6 Siglec-E-deficient DCs demonstrate elevated maturation status upon stimulation. A-C, Secretion levels of other cytokines (A), chemokines (B) and maturation markers (C) of CtrV and EKO Sp37A3 cells. Data are presented as mean ( $\pm$  SD), and unpaired t test was used for one-way comparisons (\* $P$ <0.0332, \*\* $P$ <0.0021, \*\*\* $P$ <0.0002, \*\*\*\* $P$ <0.0001).**

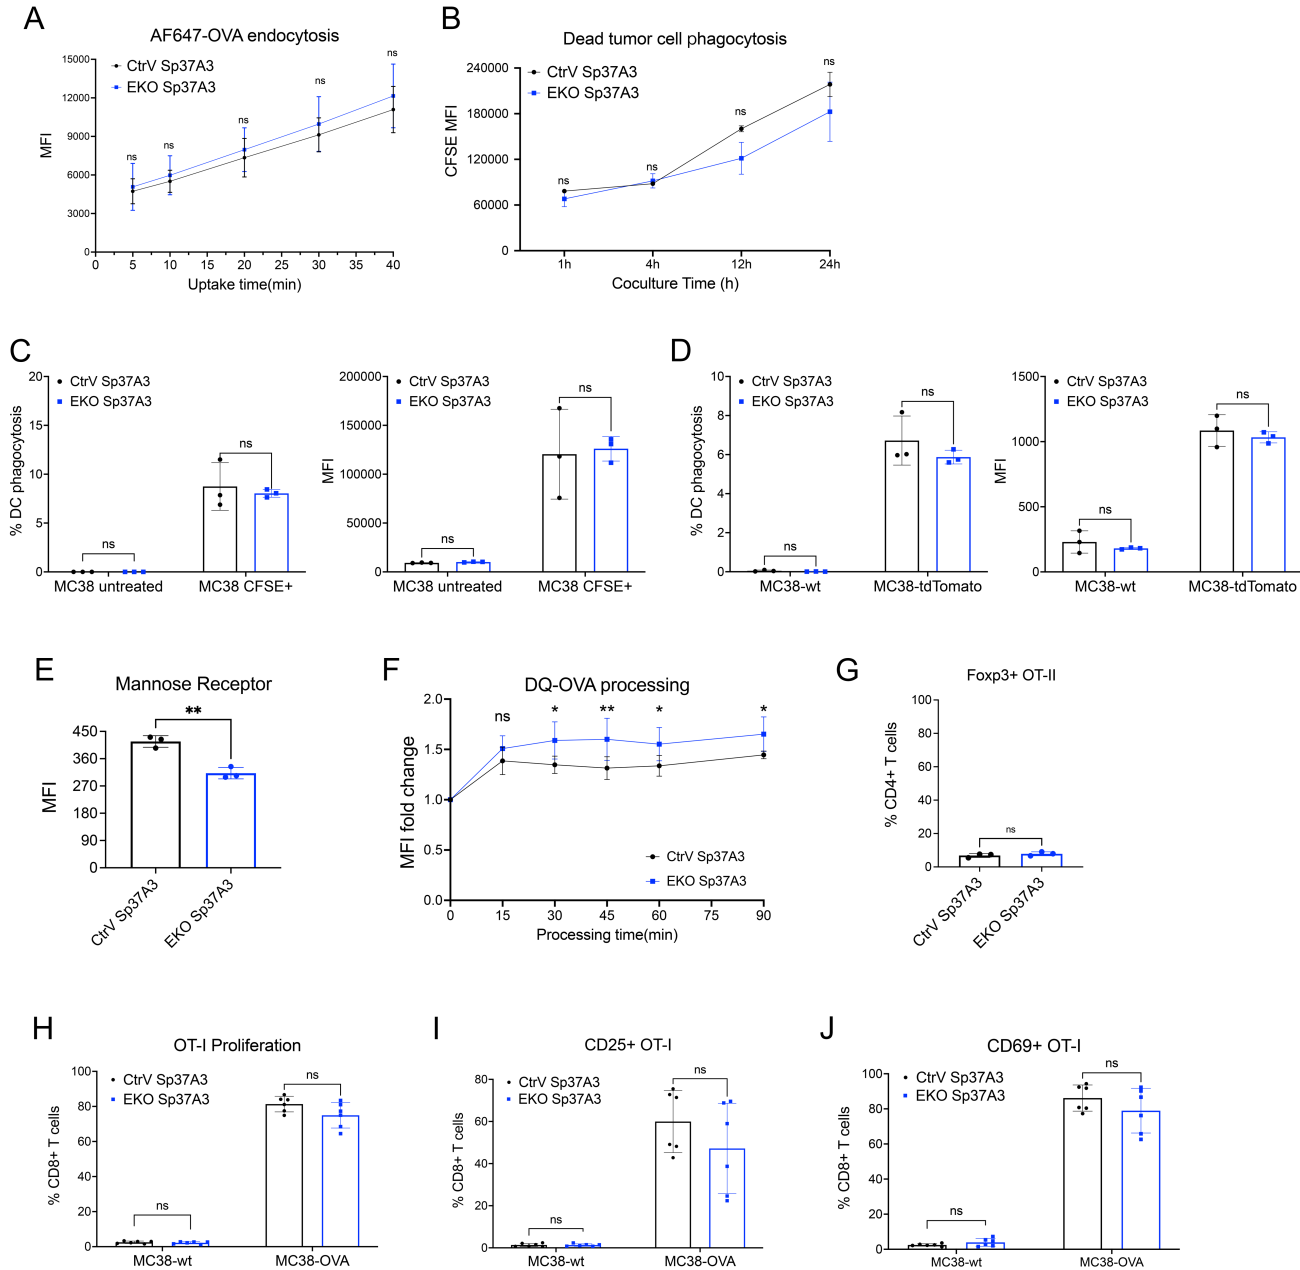

**Figure S7 Siglec-E expression affects antigen processing.** **A**, and **B**, Phagocytosis of soluble AF647-conjugated OVA antigen (**A**) and CFSE-labelled heat-shocked MC38 cells (**B**) by Sp37A3 DCs. **C**, and **D**, Sp37A3 endocytosis of live fluorescent tumor cells. Sp37A3 DCs were co-cultured 4 hours at 1:2 ratio with untreated MC38 cells or CFSE-labelled MC38 cells (**C**), wildtype MC38 (MC38-wt) cells or tdTomato+ MC38 cells (**D**). **E**, Expression level of Mannose Receptor on both Sp37A3 cells. **F**, DQ-OVA antigen processing assay. EKO Sp37A3 cells were compared with CtrV Sp37A3 cells. **G**, Frequency of Foxp3+ Treg cells in CD4+ OT-II cells. **H-J**, Sp37A3 DCs were pulsed with heat-shocked wildtype

MC38 cells or MC38-OVA cells. Then co-culture with OT-I cells for 48h to test antigen cross-presentation efficiency. Proliferation was measured by flow cytometric determination of cell trace violet dilution (H). In addition, activation of T cells was measured by CD25 (I) and CD69 (J) expression studied by flow cytometry. Data are presented as mean ( $\pm$  SD) and two-way ANOVA was used for two-way comparisons (\* $P < 0.0332$ , \*\* $P < 0.0021$ , \*\*\* $P < 0.0002$ , \*\*\*\* $P < 0.0001$ ).

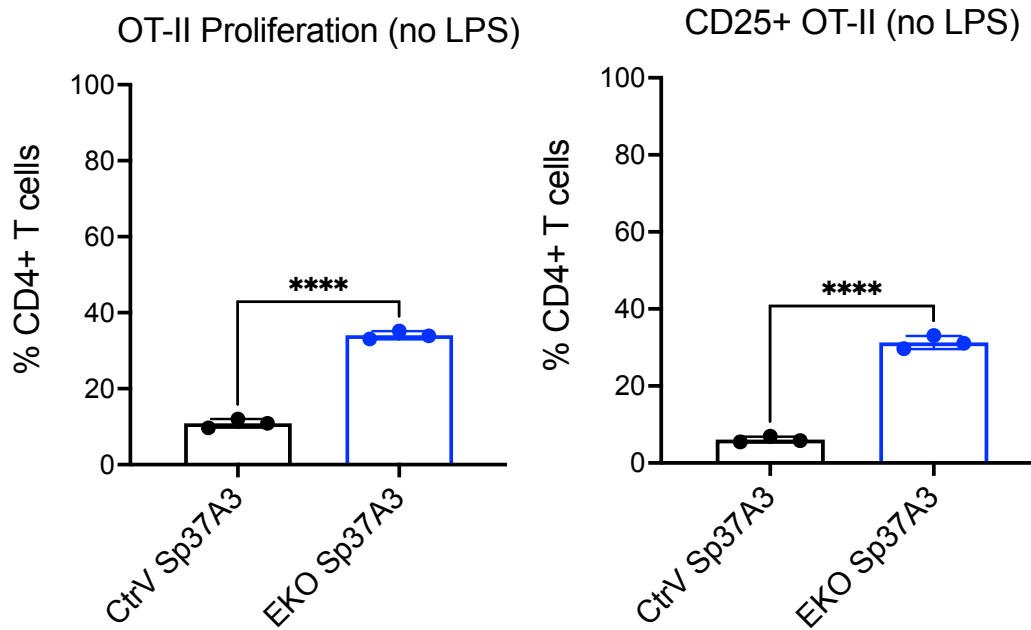

**Figure S8 Proliferation and activation of OT-II cells without LPS used for DC activation.**

Experiments were performed similarly as studies shown in main figure 5, but no LPS was used for maturation of DC cell lines.
